# Supplementary material for: Metabolic and Lipidomic Assessment of Kidney Cells Exposed to Nephrotoxic Vancomycin Dosages
Source: MDPI journal article supplement (doi:10.3390/ijms221810111), 2021-09-18
Supplement: s1 [file s1]

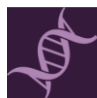

Article

# Metabolic and Lipidomic Assessment of Kidney Cells Exposed to Nephrotoxic Vancomycin Dosages – Supplementary information

Simon Lagies <sup>1,2</sup>, Roman Pichler <sup>3,4</sup>, Georg Vladimirov <sup>1</sup>, Jana Gawron <sup>1</sup>, Fabian Bätzner <sup>1</sup>, Annabell Schreiner <sup>1</sup>, Dajana Kadena <sup>1</sup>, Dietmar A. Plattner <sup>2</sup>, Soeren S. Lienkamp <sup>3,5</sup> and Bernd Kammerer <sup>1,2,6,\*</sup>

<sup>1</sup> Centre for Integrative Signalling Analysis, University of Freiburg, 79104 Freiburg, Germany; simon.lagies@zbsa.uni-freiburg.de (S.L.); georgvladimirov@web.de (G.V.); jana@gawron24.de (J.G.); fabian.baezner@gmx.de (F.B.); annabell-schreiner@gmx.de (A.S.); kadenadajana@yahoo.com (D.K.)

<sup>2</sup> Institute of Organic Chemistry, University of Freiburg, 79104 Freiburg, Germany; dplatt@chemie.uni-freiburg.de

<sup>3</sup> Department of Medicine IV: Nephrology and Primary Care, Medical Center – University of Freiburg, Faculty of Medicine, University of Freiburg, 79110 Freiburg, Germany; roman.pichler@uniklinik-freiburg.de (R.P.); soeren.lienkamp@anatomy.uzh.ch (S.S.L.)

<sup>4</sup> Berta-Ottenstein-Programme for Clinician Scientists, Faculty of Medicine, University of Freiburg, 79110 Freiburg, Germany

<sup>5</sup> Institute of Anatomy, University of Zurich, 8057 Zurich, Switzerland

<sup>6</sup> BIOS Centre for Biological Signalling Studies, University of Freiburg, 79104 Freiburg, Germany

\* Correspondence: bernd.kammerer@zbsa.uni-freiburg.de

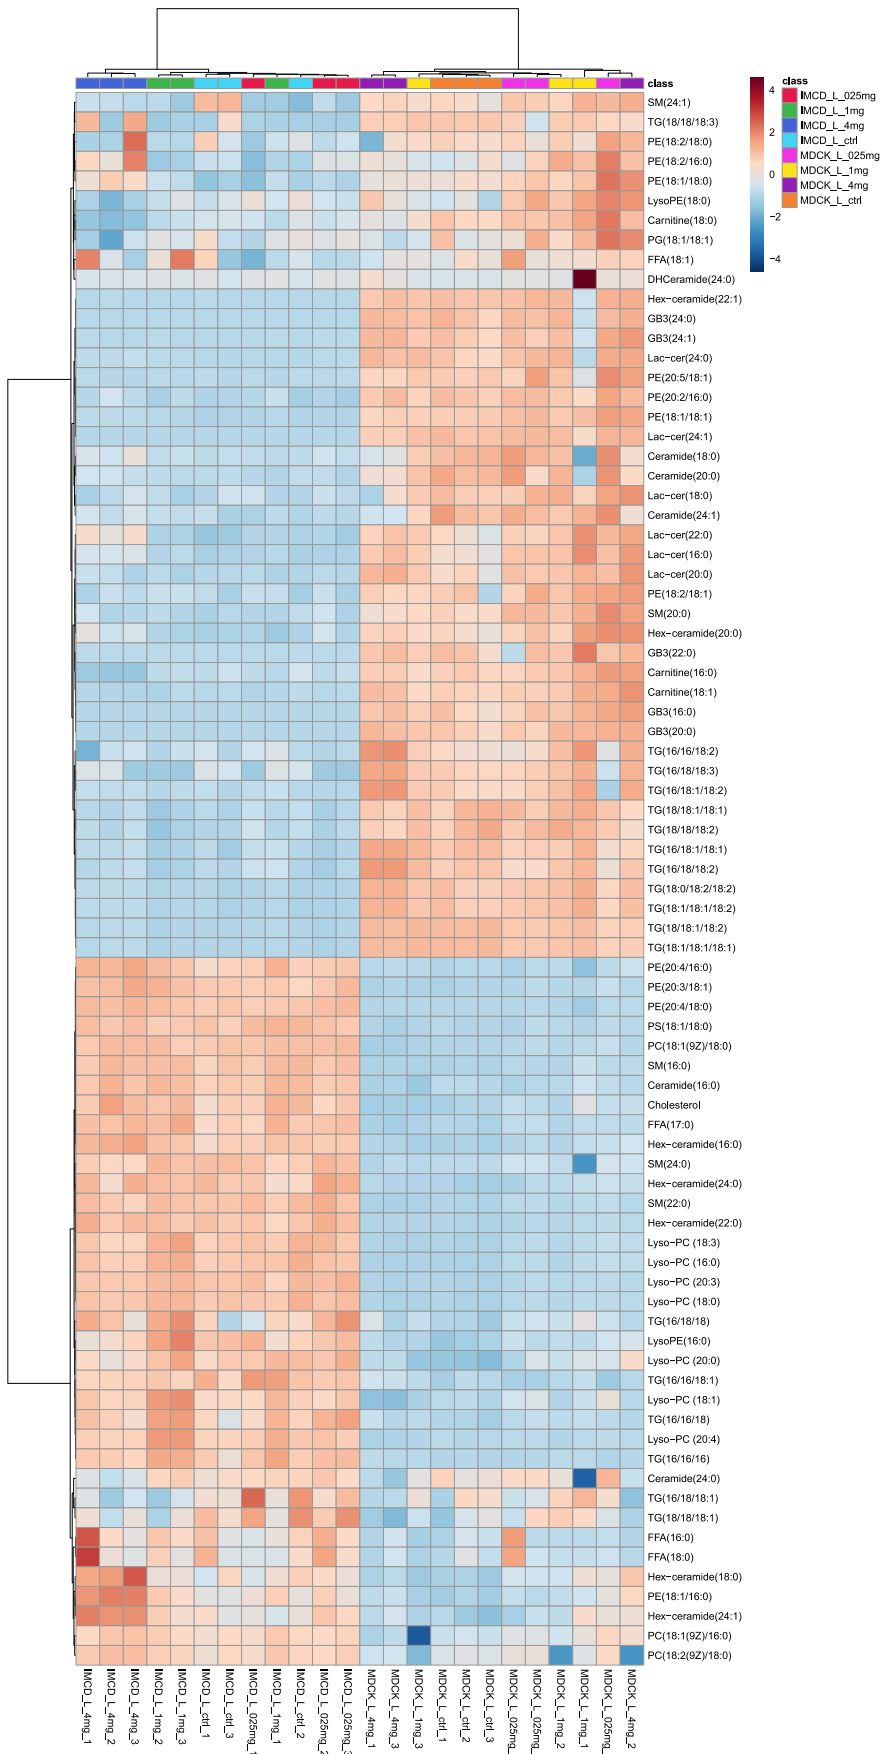

Figure S1: Heat map of all detected lipid species. Ranged scaled z-scores are displayed.
